# Supplementary material
Source: HighWire-hosted journal article supplement (https://care.diabetesjournals.org/content/suppl/2005/08/26/28.9.2267)
Supplement: dc00357OnlineAppendix1StudyDetails.pdf [file dc00357OnlineAppendix1StudyDetails.pdf]

Appendix one. Studies included in the systematic review

| Citation                                                    | Patients                                                         | Baseline status                                                                                                                                                                                     | Intervention                                                                                                                                                                                                                                                                                       | Regimen                                                                                                                                                                           | Route | Length of nutritional intervention |
|-------------------------------------------------------------|------------------------------------------------------------------|-----------------------------------------------------------------------------------------------------------------------------------------------------------------------------------------------------|----------------------------------------------------------------------------------------------------------------------------------------------------------------------------------------------------------------------------------------------------------------------------------------------------|-----------------------------------------------------------------------------------------------------------------------------------------------------------------------------------|-------|------------------------------------|
| <b>Nutritional support vs. routine care</b>                 |                                                                  |                                                                                                                                                                                                     |                                                                                                                                                                                                                                                                                                    |                                                                                                                                                                                   |       |                                    |
| <b>RCTs</b>                                                 |                                                                  |                                                                                                                                                                                                     |                                                                                                                                                                                                                                                                                                    |                                                                                                                                                                                   |       |                                    |
| Galkowski <i>et. al.</i> 1989 (57), RCT, 3 way latin square | 5 elderly patients, type 2 diabetes                              | No information provided                                                                                                                                                                             | <u>Diabetes-specific formula (17 En% protein, 33 En% CHO, 50 En% fat; fiber, fructose; exp. formula), n=5</u><br>Standard formula (17 En% protein, 53 En% CHO, 30 En% fat), n=5<br><u>Mixed food (isocaloric equivalent food snack), n=5</u>                                                       | For 3 week period, the allocated snack was consumed on Mon, Weds, Fri afternoons (amount "equivalent to usual snack"). Effect on ac (supper) blood glucose concentration compared | oral  | 3 weeks                            |
| Sturmer <i>et. al.</i> 1994 (56), RCT, 3 way latin square   | 30 patients, type 2 diabetes (BMI 26.9 ± 2.7 kg/m <sup>2</sup> ) | Diet alone (n=9), Glibenclamide+diet (n=10, morning dose 4.4mg), insulin+diet (n=11, morning dose 29IU). Mean baseline BMI=27 kg/m <sup>2</sup> , age=63 years, HbA1c=9%, fasting glucose=7.4mmol/L | <u>Diabetes-specific formula (15 En% protein (soy), 53 En% CHO, 32 En% fat (69% MUFA); 1.5g fiber/100ml (soy fiber), 3.5g fructose/100ml; Fresubin diabetes, Fresenius) n=20</u><br>Standard formula (15 En% protein, 53 En% CHO, 32 En% fat), n=30<br><u>Mixed meal (typical breakfast), n=30</u> | Overnight fast, then medication, then test meal (400mL=360kcal). Multiple blood samples 0 (after medication)-240mins after meal                                                   | oral  | single meal study                  |

**Diabetes vs. standard formula studies, short-term (follow-up <24 hours)**

**RCTs**

|                                                                       |                                   |                                                                                                                                                                                                                        |                                                                                                                                                                                                      |                                                                                                                                                                                                                                       |      |                   |
|-----------------------------------------------------------------------|-----------------------------------|------------------------------------------------------------------------------------------------------------------------------------------------------------------------------------------------------------------------|------------------------------------------------------------------------------------------------------------------------------------------------------------------------------------------------------|---------------------------------------------------------------------------------------------------------------------------------------------------------------------------------------------------------------------------------------|------|-------------------|
| del Carmen Crespillo <i>et. al.</i> 2003 (14), RCT 3 way latin square | 11 patients with type 1 diabetes  | Mean baseline BMI=24 kg/m <sup>2</sup> , age 30.4 years. All receiving stable doses of insulin (n=8, NPH+lispro insulin, n=1 NPH + regular, n=2 NPH alone. Mean dose at breakfast 15.3IU), all HbA1c in the range 5-7% | Diabetes-specific formula (17 En% protein (soy), 45 En% CHO, 38 En% fat (67% MUFA); 1.5g fiber/100ml (fiber mixture, mainly soluble), 1.9g fructose/100ml; Nutrison Diabetes/Diason, Nutricia), n=11 | Each patient consumed 250mL (=250kcal) of each diet as a single meal after overnight fast on 3 separate days, separated by 1 week interval between each. Blood samples 0 (5-20 mins after medication, before meal) -150mins post meal | oral | single meal study |
|                                                                       |                                   |                                                                                                                                                                                                                        | Standard formula (16 En% protein, 49 En% CHO, 35 En% fat), n=11                                                                                                                                      |                                                                                                                                                                                                                                       |      |                   |
|                                                                       |                                   |                                                                                                                                                                                                                        | Third intervention not considered (n=11)                                                                                                                                                             |                                                                                                                                                                                                                                       |      |                   |
| Fix <i>et. al.</i> 2004 (61), RCT, parallel groups                    | 168 patients with type 2 diabetes | No information provided                                                                                                                                                                                                | Diabetes-specific formula (17 En% protein, 34 En% CHO, 49 En% fat (71% MUFA); 1.4g fiber/100ml (soy fiber), 1.8g fructose/100ml; Glucerna, Abbott), n=42                                             | One dose challenge (amount not stated), blood samples 0-240mins                                                                                                                                                                       | oral | single meal study |
|                                                                       |                                   |                                                                                                                                                                                                                        | Standard formula (14 En% protein, 64% CHO, 22% fat), n=42                                                                                                                                            |                                                                                                                                                                                                                                       |      |                   |

|                                                                       |                                                                     |                                                                                                                                                                                           | Other interventions<br>not considered<br>(n=84)                                                                                                                                                                                                                                                                    |                                                                                               |      |                   |
|-----------------------------------------------------------------------|---------------------------------------------------------------------|-------------------------------------------------------------------------------------------------------------------------------------------------------------------------------------------|--------------------------------------------------------------------------------------------------------------------------------------------------------------------------------------------------------------------------------------------------------------------------------------------------------------------|-----------------------------------------------------------------------------------------------|------|-------------------|
| Golay <i>et al.</i> 1995 (62), RCT, double blind, 3 way latin square  | 6 patients, type 2 diabetes (BMI 30.4 ± 5.1kg/m <sup>2</sup> )      | n=4 treated with sulphonylureas, n=2 diet alone, n=0 insulin. Mean baseline BMI=30 kg/m <sup>2</sup> , age=64 years, fasting glucose=7.4mmol/L                                            | Diabetes-specific formula (16 En% protein, 52 En% CHO, 32 En% fat; 2.0g fiber/100ml (guar gum), 3.0g fructose/100ml, exp. formula), n=6<br><hr/> Standard formula (14 En% protein, 52 En% CHO, 34 En% fat), n=6<br><hr/> Third intervention not considered (n=6)                                                   | Test meal 60g CHO (454kcal) within 15mins, following overnight fast. Blood samples 0-4 hours. | oral | single meal study |
| Hofman <i>et al.</i> 2004 (66), RCT, double blind, 4 way latin square | 10 patients with type 2 diabetes (BMI 28.1 ± 1.3kg/m <sup>2</sup> ) | An unknown number were on oral hypoglycemics, but these were not taken prior to the test meal. Mean baseline BMI=28 kg/m <sup>2</sup> , baseline fasting glucose=8.9mmol/L, age=60 years. | Diabetes-specific formula (16 En% protein (50% soy), 35 En% CHO, 49 En% fat (70% MUFA); 2.5g fiber/100ml (fiber mixture, mainly soluble), 1.8g fructose/100ml; Diasip, Nutricia), n=10<br><hr/> Standard formula (16 En% protein, 49 En% CHO, 35 En% fat), n=10<br><hr/> Other interventions not considered (n=20) | Overnight fast then consumed 200mL (200kcal) within 2mins. Blood samples taken 0-120min       | oral | single meal study |
| Peters and                                                            | 11 patients                                                         | Insulin/dextrose from                                                                                                                                                                     | Report of 3                                                                                                                                                                                                                                                                                                        | Overnight fast, then                                                                          | oral | single meal       |

|                                                                  |                                                                                  |                                                                                                                                                                                                                                                                                                                                                    |                                                                                                                                                                                                                                                                                                                                                               |                                                                                                                                                                                                                                                 |      |                      |
|------------------------------------------------------------------|----------------------------------------------------------------------------------|----------------------------------------------------------------------------------------------------------------------------------------------------------------------------------------------------------------------------------------------------------------------------------------------------------------------------------------------------|---------------------------------------------------------------------------------------------------------------------------------------------------------------------------------------------------------------------------------------------------------------------------------------------------------------------------------------------------------------|-------------------------------------------------------------------------------------------------------------------------------------------------------------------------------------------------------------------------------------------------|------|----------------------|
| Davidson<br>1992 (70),<br>RCT, CCT,<br>CCT                       | with type 1<br>diabetes<br>(BMI 25.1 ±<br>0.8kg/m <sup>2</sup> )                 | BIOSTATOR, no other<br>medication known to<br>affect glucose<br>metabolism. Mean<br>baseline BMI=25 kg/m <sup>2</sup> ,<br>age=32 years.                                                                                                                                                                                                           | different studies<br>comparing diabetes-<br>specific formulae<br>and standard<br>formulae                                                                                                                                                                                                                                                                     | attached to BIOSTATOR,<br>brought to steady state over<br>several hours (blood<br>glucose of 8.4mmol/L).<br>Ingested 20mL formula<br>every 15 mins for 4 hours<br>(total 320mL). Blood<br>samples 0-4 hours.                                    |      | study                |
| Peters <i>et al.</i> 1989<br>(71), RCT,<br>crossover             | 10 patients<br>with type 1<br>diabetes<br>(range BMI<br>21-29kg/m <sup>2</sup> ) | Insulin/dextrose from<br>BIOSTATOR. 1 patient<br>on hypertensives. No<br>long or intermediate<br>acting insulin for previous<br>24hours. Range baseline<br>BMI= 21-29 kg/m <sup>2</sup> ,<br>age=23-57 years. Mean<br>baseline HbA1c, serum<br>albumin, respectively:<br>9.6%, 40g/L (diabetes<br>formula group) vs. 9%,<br>38g/L (standard group) | <u>Diabetes-specific<br/>formula (17 En%<br/>protein, , 33 En%<br/>CHO, 50 En% fat<br/>(71% MUFA); 1.4g<br/>fiber/100ml (soy<br/>fiber), 1.8g<br/>fructose/100ml;<br/>exp. formula), n=10</u><br>Standard formula<br>(17 En% protein, 53<br>En% CHO, 30 En%<br>fat), n=10                                                                                     | Each patient had both<br>formulae on 2 separate days<br>separated by 2 weeks.<br>Overnight fast, attached to<br>BIOSTATOR, brought to<br>steady state (blood glucose<br>8.4mM). Ingested 20mL<br>(20kcal) formula every 15<br>mins for 240mins. | oral | single meal<br>study |
| Printz <i>et al.</i> 1997<br>(72), RCT,<br>3 way latin<br>square | 10 patients<br>with type 2<br>diabetes<br>(BMI 26.2 ±<br>3.6kg/m <sup>2</sup> )  | All patients taking<br>glibenclamide (3.5-<br>10.5mg/day). Mean<br>baseline BMI=26 kg/m <sup>2</sup> ,<br>age=56 years, fasting<br>glucose=133mg/dL,<br>HbA1c=8.4%.                                                                                                                                                                                | <u>Diabetes-specific<br/>formula (15 En%<br/>protein (soy), 53<br/>En% CHO, 32 En%<br/>fat (69% MUFA);<br/>1.5g fiber/100ml<br/>(soy fiber), 3.5g<br/>fructose/100ml;<br/>Fresubin diabetes,<br/>Fresenius), n=10</u><br>Standard formula<br>(16 En% protein, 49<br>En% CHO, 35 En%<br>fat ), n=10<br><u>Third intervention<br/>not considered<br/>(n=10)</u> | Each patient consumed test<br>diets as a single meal<br>(500mL) after overnight<br>fast, each on a separate day,<br>separated by 10 days.<br>Multiple postprandial blood<br>samples taken, after<br>medication, 0-180mins<br>after meal         | oral | single meal<br>study |

|                                                           |                                                                     |                                                                                                                                                                                                                                                |                                                                                                                                                                                                                                                     |                                                                                                         |      |                   |
|-----------------------------------------------------------|---------------------------------------------------------------------|------------------------------------------------------------------------------------------------------------------------------------------------------------------------------------------------------------------------------------------------|-----------------------------------------------------------------------------------------------------------------------------------------------------------------------------------------------------------------------------------------------------|---------------------------------------------------------------------------------------------------------|------|-------------------|
| Sanz <i>et. al.</i> 1994 (59), RCT, parallel groups       | 80 patients with type 2 diabetes                                    | Patients were taking insulin or oral agents; no further details provided.                                                                                                                                                                      | Diabetes-specific formula (17 En% protein, 33 En% CHO, 50 En% fat (71% MUFA); 1.4g fiber/100ml (soy fiber), 1.8g fructose/100ml; Glucerna, Abbott), n=not stated ?40<br>Standard formula (15 En% protein, 54 En% CHO, 31 En% fat), n=not stated ?40 | 250cc eaten after medication. Blood samples 0-120 mins                                                  | oral | single meal study |
| Sanz-Paris <i>et. al.</i> 1998 (58), RCT, parallel groups | 52 patients with type 2 diabetes (BMI 29.2 ± 2.7kg/m <sup>2</sup> ) | Diabetes-specific group had n=7 treated by a sulfonylurea compared to n=5 in standard group. Both groups comprised n=20 treated with NPH insulin. Mean baseline BMI=29 kg/m <sup>2</sup> , age=65 years, HbA1c=6.5%, triacylglycerols=151mg/dL | Diabetes-specific formula (17 En% protein, 33 En% CHO, 50 En% fat (71% MUFA); 1.4g fiber/100ml (soy fiber), 1.8g fructose/100ml; Glucerna, Abbott), n=27<br>Standard formula (15 En% protein, 54 En% CHO, 31 En% fat (30% MUFA), n=25               | Single meal (250ml = 250kcal) after a 12 hour fast. Blood samples taken 0 (before medication) - 120mins | oral | single meal study |
| Sturmer <i>et. al.</i> 1994 (56)                          | See above                                                           |                                                                                                                                                                                                                                                |                                                                                                                                                                                                                                                     |                                                                                                         |      |                   |

|                                                                       |                                              |                         |                                                                                                                                                                                                      |                                                                                                            |      |                   |
|-----------------------------------------------------------------------|----------------------------------------------|-------------------------|------------------------------------------------------------------------------------------------------------------------------------------------------------------------------------------------------|------------------------------------------------------------------------------------------------------------|------|-------------------|
| Hofman <i>et al.</i> 2004 (65), RCT, double blind, 3 way latin square | 12 patients with diabetes (type unspecified) | No information provided | Diabetes-specific formula (17 En% protein (soy), 45 En% CHO, 38 En% fat (67% MUFA); 1.5g fiber/100ml (fiber mixture, mainly soluble), 1.9g fructose/100ml, Nutrison Diabetes/Diason, Nutricia), n=12 | Continuous feed (125mL/h) for 6 hours following overnight fast, route not stated. Blood samples 0-6 hours. | tube | single meal study |
|                                                                       |                                              |                         | Standard formula (49 En% CHO), n=12                                                                                                                                                                  |                                                                                                            |      |                   |
|                                                                       |                                              |                         | Third intervention not considered (n=12)                                                                                                                                                             |                                                                                                            |      |                   |

---

**Non RCTs**

|                                                     |                                        |                                                           |                                                                                                         |                                                                             |      |                   |
|-----------------------------------------------------|----------------------------------------|-----------------------------------------------------------|---------------------------------------------------------------------------------------------------------|-----------------------------------------------------------------------------|------|-------------------|
| Harley <i>et al.</i> 1989 (64), CCT, design unclear | 10 obese patients with type 2 diabetes | Mean baseline HbA1c 9.5%. No further information provided | Diabetes-specific formula (17 En% protein, 33 En% CHO, 50 En% fat; fiber, fructose; exp. formula), n=10 | 48 hour fast, then 20kcal every 15mins for 4 hours (simulated tube feeding) | oral | single meal study |
|                                                     |                                        |                                                           | Standard formula (17 En% protein, 53 En% CHO, 30 En% fat), n=10                                         |                                                                             |      |                   |

---

**Diabetes vs. standard formula studies, long-term (follow up > 6 days)**

---

**RCTs**

---

|                                                                                                                 |                                                                                                 |                                                                                                                                                                                                                                                                                               |                                                                                                                                                                                                                                                      |                                                                                                                                                                    |             |                 |
|-----------------------------------------------------------------------------------------------------------------|-------------------------------------------------------------------------------------------------|-----------------------------------------------------------------------------------------------------------------------------------------------------------------------------------------------------------------------------------------------------------------------------------------------|------------------------------------------------------------------------------------------------------------------------------------------------------------------------------------------------------------------------------------------------------|--------------------------------------------------------------------------------------------------------------------------------------------------------------------|-------------|-----------------|
| <p>Craig <i>et. al.</i> 1998 (60), RCT, double blind, 2 centre, parallel groups</p>                             | <p>27 elderly patients with type 2 diabetes</p>                                                 | <p>61% patients in diabetes-formula group and 44% patients in standard group were on insulin at baseline. Mean baseline HbA1c, fasting glucose, respectively: 6.9%, 7.3mmol/L (diabetes-formula group) vs. 6.9%, 6.9mmol/L (standard group). No baseline BMI provided. Mean age 81 years.</p> | <p>Diabetes-specific formula (17 En% protein, 33 En% CHO, 50 En% fat (71% MUFA); 1.4g fiber/100ml (soy fiber), 1.8g fructose/100ml; <b>Glucerna, Abbott</b>), n=14</p> <hr/> <p>Standard formula (17 En% protein, 53 En% CHO, 30 En% fat), n=13</p>  | <p>Diets were administered <i>solus</i> via enteral access device, continuously or intermittently, to provide the total energy requirement of each patient</p>     | <p>tube</p> | <p>3 months</p> |
| <p>Galkowski <i>et. al.</i> 1989 (57)<br/>McCargar <i>et. al.</i> 1998 (68), RCT, 2 centre, parallel groups</p> | <p>See above<br/>32 patients with type 2 diabetes (BMI 28.4/28.7 ± 1.1/1.1kg/m<sup>2</sup>)</p> | <p>Not taking insulin. 23/32 on oral medication at baseline (groups balanced). Mean baseline BMI, age, fasting glucose, respectively: 28.4, 55 years, 9.16mmol/L (diabetes formula group) vs. 28.7, 59 years, 8.73mmol/L (standard group)</p>                                                 | <p>Diabetes-specific formula (17 En % protein, 33 En% CHO, 50 En% fat (71% MUFA); 1.4g fiber/100ml (soy fiber), 1.8g fructose/100ml; <b>Glucerna, Abbott</b>), n=16</p> <hr/> <p>Standard formula (15 En% protein, 55 En% CHO, 31 En% fat), n=16</p> | <p>Diets prescribed as main source of energy (&gt;80%). Measurements conducted for every meal 2 days each week (by patients), and by laboratory (days 1, 8 29)</p> | <p>oral</p> | <p>28 days</p>  |

|                                                                                 |                                                                                                                                                      |                                                                                                                                                                                                                                                                                                                                       |                                                                                                                                                                                                                                                       |                                                                                                                                                                                                                             |      |         |
|---------------------------------------------------------------------------------|------------------------------------------------------------------------------------------------------------------------------------------------------|---------------------------------------------------------------------------------------------------------------------------------------------------------------------------------------------------------------------------------------------------------------------------------------------------------------------------------------|-------------------------------------------------------------------------------------------------------------------------------------------------------------------------------------------------------------------------------------------------------|-----------------------------------------------------------------------------------------------------------------------------------------------------------------------------------------------------------------------------|------|---------|
| Mayr <i>et. al.</i> 2004 (67), RCT, double blind, multi centre, parallel groups | 78 patients with type 2 diabetes (BMI 25.6/26.5 kg/m <sup>2</sup> )                                                                                  | Patients received insulin during study. Median baseline BMI, age, fasting glucose, HbA1c, respectively: 25.6, 71 years, 143mg/dL, 7.7% (diabetes formula group) vs.26.5, 72 years, 158mg/dL, 7.4% (standard formula group)                                                                                                            | Diabetes-specific formula (18 En% protein, 37 En% CHO, 45 En% fat (71% MUFA); 2.0g fiber/100ml (fiber mixture), 1.6g fructose/100ml; Diben, Fresenius), n=39<br><hr/> Standard formula (isoenergetic, isonitrogenous, composition not provided), n=39 | Administered at rate of 27kcal/kgBW/day (max 2025kcal/day). Route not described                                                                                                                                             | tube | 84 days |
| Mesejo <i>et. al.</i> 2003 (69), RCT, single blind, 2 centre, parallel groups   | 50 critically ill patients with diabetes (type 1 or 2) and/or stress diabetes caused by acute illness (BMI 24.7/25.7 ± 2.57/2.41 kg/m <sup>2</sup> ) | Continuous insulin infusion. Diabetes-formula group: mean baseline BMI=25 kg/m <sup>2</sup> , age=65 years, HbA1c=6.8%, plasma glucose=190.9mg/dL, creatinine height index=52.8% Standard formula group: mean baseline BMI=26 kg/m <sup>2</sup> , age=65 years, HbA1c=6.8%, plasma glucose=210.3mg/dL, creatinine height index=50.2%. | Diabetes-specific formula (20 En% protein, 40 En% CHO, 40 En% fat (36% MUFA); 1.5g fiber/100ml (guar gum), 3.2g fructose/100ml; Novasource Diabet Plus, Novartis), n=26<br><hr/> Standard formula (22 En% protein, 49 En% CHO, 29 En% fat), n=24      | Administered when possible by nasogastric tube, changing to transpyloric tube if intolerant. Continuous infusion, 24h/day, at rate of Harris Benedict with stress factor of 1.2. 50% administered day 1, 100% day 2 onwards | tube | 14 days |

|                                                                  |                                   |                         |                                                                                                                                                                                         |                                                                                                      |      |        |
|------------------------------------------------------------------|-----------------------------------|-------------------------|-----------------------------------------------------------------------------------------------------------------------------------------------------------------------------------------|------------------------------------------------------------------------------------------------------|------|--------|
| Wang <i>et al.</i> 2003 (74), RCT, multi centre, parallel groups | 120 patients with type 2 diabetes | No information provided | Diabetes-specific formula (15 En% protein (soy), 53 En% CHO, 32 En% fat (69% MUFA); 1.5g fiber/100ml (soy fiber), 3.5g fructose/100ml; Fresubin diabetes, Fresenius) , n=not stated ?60 | Feeds administered bolus for 6 days. 30kcal/kgBW/d. 100mL/h, for 14-16hours/day. Route not described | tube | 6 days |
|                                                                  |                                   |                         | Standard formula (isoenergetic, isonitrogenous; composition not provided), n=not stated ?60                                                                                             |                                                                                                      |      |        |

---

#### Non RCTs

|                                                     |                                                                         |                                                                                                                                 |                                                                                                         |                                                                                                                                           |      |        |
|-----------------------------------------------------|-------------------------------------------------------------------------|---------------------------------------------------------------------------------------------------------------------------------|---------------------------------------------------------------------------------------------------------|-------------------------------------------------------------------------------------------------------------------------------------------|------|--------|
| Grahm <i>et al.</i> 1989 (63), CCT, parallel groups | 20 critically ill patients with stress diabetes caused by acute illness | Mean baseline serum albumin = 37 (diabetes formula group) vs. 35 (standard formula group) g/L. No further information provided. | Diabetes-specific formula (17 En% protein, 33 En% CHO, 50 En% fat; fiber, fructose; exp. formula), n=10 | Support begun immediately via continuous pump infusion. "small bowel feeding tube". Metabolic cart used to determine caloric requirements | tube | 7 days |
|                                                     |                                                                         |                                                                                                                                 | Standard formula (17 En% protein, 74 En% CHO, 9 En% fat), n=10                                          |                                                                                                                                           |      |        |

---

#### Other studies

##### RCTs

|                                                   |                                  |                         |                                                                                                                             |                                                                                                               |      |        |
|---------------------------------------------------|----------------------------------|-------------------------|-----------------------------------------------------------------------------------------------------------------------------|---------------------------------------------------------------------------------------------------------------|------|--------|
| Druetzler <i>et al.</i> 1985 (11), RCT, crossover | 10 patients with type 2 diabetes | No information provided | Standard formula (composition not provided), n=10<br>Standard formula + soy polysaccharide: composition not provided), n=10 | Subjects consumed each formula as sole source of nutrition for 5 days. 9 day washout between crossover phases | oral | 5 days |
|---------------------------------------------------|----------------------------------|-------------------------|-----------------------------------------------------------------------------------------------------------------------------|---------------------------------------------------------------------------------------------------------------|------|--------|

|                                                                             |                                                                      |                                                                                                          |                                                                                                                                                                                                                                             |                                                                                                                                                                                                                                                                                    |      |                   |
|-----------------------------------------------------------------------------|----------------------------------------------------------------------|----------------------------------------------------------------------------------------------------------|---------------------------------------------------------------------------------------------------------------------------------------------------------------------------------------------------------------------------------------------|------------------------------------------------------------------------------------------------------------------------------------------------------------------------------------------------------------------------------------------------------------------------------------|------|-------------------|
| <i>Thomas et al. 1988 (73), RCT, 4 way latin square</i>                     | 12 patients with type 2 diabetes (BMI 28.5 ± 3.13kg/m <sup>2</sup> ) | Oral hypoglycemic agent (n=6) or diet alone (n=6). Mean baseline BMI=29 kg/m <sup>2</sup> , age=56 years | <p>Low carbohydrate formula with fiber (17 En% protein, 28 En% CHO, 55 En% fat; exp. formula), n=12</p> <hr/> <p>Standard formula (17 En% protein, 54 En% CHO, 29 En% fat), n=12</p> <hr/> <p>Other interventions not considered (n=24)</p> | Each patient consumed each diet as a single meal (333mL = approx 500kcal) after overnight fast. Blood samples -15 (?before medication) to +180mins                                                                                                                                 | oral | single meal study |
| <b>Non RCTs</b>                                                             |                                                                      |                                                                                                          |                                                                                                                                                                                                                                             |                                                                                                                                                                                                                                                                                    |      |                   |
| <i>Abbruzzese 1993 (76), CT, single group, before / after</i>               | 8 elderly patients with type 2 diabetes                              | No information provided. Previously fed various standard formulae (high carbohydrate)                    | Diabetes-specific formula (17 En% protein, 33 En% CHO, 50 En% fat (71% MUFA); 1.4g fiber/100ml (soy fiber), 1.8g fructose/100ml; Glucerna, Abbott), n=8                                                                                     | Continuous total enteral nutrition - no further details.                                                                                                                                                                                                                           | tube | 42 days           |
| <i>Peters and Davidson 1996 (75), CCT, single blind, 3 way latin square</i> | 12 patients with type 1 diabetes                                     | Insulin/dextrose from BIOSTATOR. No further information provided                                         | <p>Formula X (12 En% protein, 40 En% CHO, 48 En% fat), n=12</p> <hr/> <p>Formula Y (11 En% protein, 29 En% CHO, 60 En% fat), n=12</p> <hr/> <p>Formula Z (11 En% protein, 20 En% CHO, 69 En% fat), n=12</p>                                 | Each patient had each formula on 3 separate days separated by 1 week. Overnight fast, then attached to BIOSTATOR, brought to steady state over several hours (blood glucose of 8.4mmol/L). Ingested 30mL formula every 15 mins for 4 hours (total 480mL). Blood samples 0-4 hours. | oral | single meal study |
