# Supplementary material
Source: HighWire-hosted journal article supplement (https://care.diabetesjournals.org/content/suppl/2005/08/26/28.9.2267)
Supplement: dc00357OnlineAppendix2ExcludedStudies.pdf [file dc00357OnlineAppendix2ExcludedStudies.pdf]

## Appendix 2. Excluded studies and reasons for exclusions

Table 1. Studies excluded from review and exclusion criteria

| <b>Reason for exclusion</b>                                           | <b>Studies</b> |
|-----------------------------------------------------------------------|----------------|
| Not an original experimental study                                    | (1-9)          |
| Used an ineligible nutritional intervention *                         | (10-16)        |
| Used ineligible subjects *                                            | (17-20)        |
| Used a hypocaloric feeding regimen, with the intention of weight loss | (21-23)        |

\* See study selection criteria in main paper

1. Brackenridge BP, Campbell RK: Enteral nutritional support and supplementation in diabetes. *The Diabetes Educator* 16: 463-465, 1987
2. Campbell S, Schiller M: Considerations for enteral nutrition support of patients with diabetes. *Topics in Clinical Nutrition* 7: 23-32, 1991
3. Coulston AM: Clinical experience with modified enteral formulas for patients with diabetes. *Clin Nutr* 17 Suppl 2: 46-56, 1998
4. Gumbiner B, Low CC, Reaven PD: Effects of a monounsaturated fatty acid-enriched hypocaloric diet on cardiovascular risk factors in obese patients with type 2 diabetes. *Diabetes Care* 21 (1): 9-15, 1998
5. Park RHR, Hansell DT, Davidson LF, Henderson G, Legge V, Gray GR: Management of diabetic patients requiring nutritional support. *Nutrition* 8: 316-320, 1992
6. Pastors JG, Franz MJ, Warshaw H, Daly A, Arnold MS: How effective is medical nutrition therapy in diabetes care? *Journal of the American Dietetic Association* 103 (7): 827-831, 2003
7. Peters AL, Davidson MB: The challenge of blood glucose management in diabetic patients receiving enteral or parenteral nutrition. *JPEN J Parenter Enteral Nutr* 17 (1): 1-2, 1993
8. Schiller HJ, Galvin M, Meguid MM: Acute nutrition management in insulin dependent diabetes: Presentation of an index case. *Nutrition* 9: 360-363, 1993
9. van Drunen JDE, Hofman Z, Kuipers H: Postprandial response and glycaemic index (GI) of diabetes specific and standard clinical nutrition products. *Clinical Nutrition* 22 (Suppl 1): S16 (Abstract 057-P), 2003
10. Dyer-Parziale M: The effect of extend bar containing uncooked cornstarch on night-time glycemic excursion in subjects with type 2 diabetes. *Diabetes Research and Clinical Practice* 53 (3): 137-139, 2001
11. Garg A: High-monounsaturated-fat diets for patients with diabetes mellitus: a meta-analysis. *American Journal of Clinical Nutrition* 67 (3 Suppl): 577S-582S, 1998
12. Hermansen K, Sondergaard M, Hoie L, Carstensen M, Brock B: Beneficial effects of a soy-based dietary supplement on lipid levels and cardiovascular risk markers in type 2 diabetic subjects. *Diabetes Care* 24 (2): 228-233, 2001
13. Hernandez JM, Moccia T, Fluckey JD, Ulbrecht JS, Farrell PA: Fluid snacks to help persons with type 1 diabetes avoid late onset postexercise hypoglycemia. *Medicine and Science in Sports and Exercise* 32 (5): 904-910, 2000
14. Kirsten R, Heintz B, Nelson K, Oremek G, Speck U: Influence of two guar preparations on glycosylated hemoglobin, total cholesterol and triglycerides in patients with diabetes mellitus. *International Journal of Clinical Pharmacology, Therapy and Toxicology* 30 (12): 582-586, 1992
15. Reece EA, Hagay Z, Caseria D, Gay LJ, DeGennaro N: Do fiber-enriched diabetic diets have glucose-lowering effects in pregnancy? *American Journal of Perinatology* 10 (4): 272-274, 1993
16. Reece EA, Hagay Z, Gay LJ, O'Connor T, DeGennaro N, Homko CJ, Wiznitzer A: A randomized clinical trial of a fiber-enriched diabetic diet vs. the standard American Diabetes Association-recommended diet in the management of diabetes mellitus in pregnancy. *Journal of Maternal-Fetal Investigation* 5 (1): 8-12, 1995

17. Goke B: Influence of blood glucose and hormonal response of pancreas and intestinum after enteral diabetes substrates. *Unknown citation Year?*
18. Richter G, Schilling T, Goke B: Challenge of the entero-insular axis in healthy volunteers by liquid diets modified for the enteral nutrition of patients with diabetes mellitus. *Akt Ernahr Med* 20: 141-145, 1995
19. Shankaras SK, Chuchmach S, Chelswick K: Bowel function of tube-fed patients consuming formulas with and without dietary fibre. *Journal of Parenteral and Enteral Nutrition* 14: 508-512, 1990
20. van Drunen JDE, Hofman Z, Kuipers H: The glycaemic index (GI) of standard and diabetes specific clinical nutrition products. *Clinical Nutrition* 22 (Suppl 1): S13 (Abstract 049), 2003
21. Low CC, Grossman EB, Gumbiner B: Potentiation of effects of weight loss by monounsaturated fatty acids in obese NIDDM patients. *Diabetes* 45 (5): 569-575, 1996
22. Yip I, Go VL, DeShields S, Saltsman P, Bellman M, Thames G, Murray S, Wang HJ, Elashoff R, Heber D: Liquid meal replacements and glycemic control in obese type 2 diabetes patients. *Obesity Research* 9 (Suppl 4): 341S-347S, 2001
23. Anderson JW, Brinkman-Kaplan V, Hamilton CC, Logan JE, Collins RW, Gustafson NJ: Food-containing hypocaloric diets are as effective as liquid-supplement diets for obese individuals with NIDDM. *Diabetes Care* 17 (6): 602-604, 1994
